# Supplementary material for: Identification and validation of candidate genes dysregulated in alveolar macrophages of acute respiratory distress syndrome
Source: PeerJ journal article supplement (doi:10.7717/peerj.12312), 2021-10-26
Supplement: Blots.pdf [file Blots.pdf]

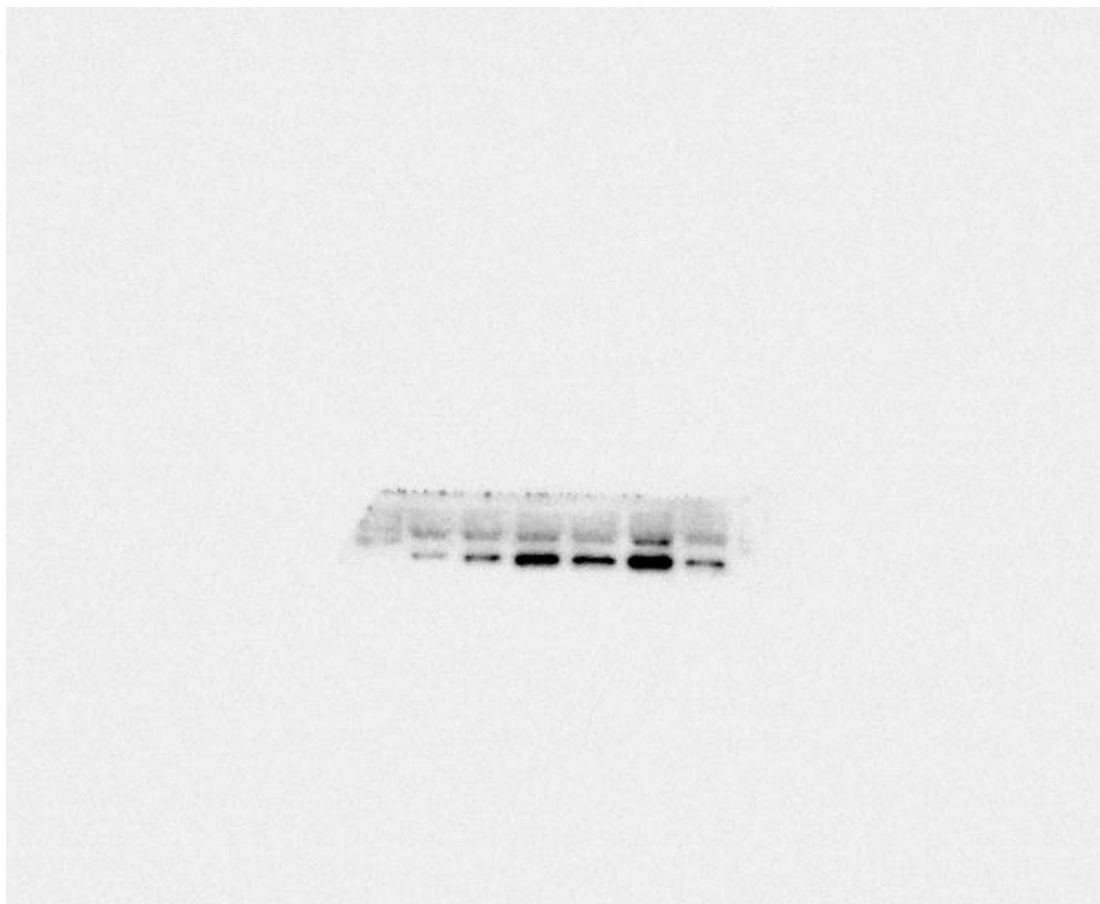

LPS-CCR2

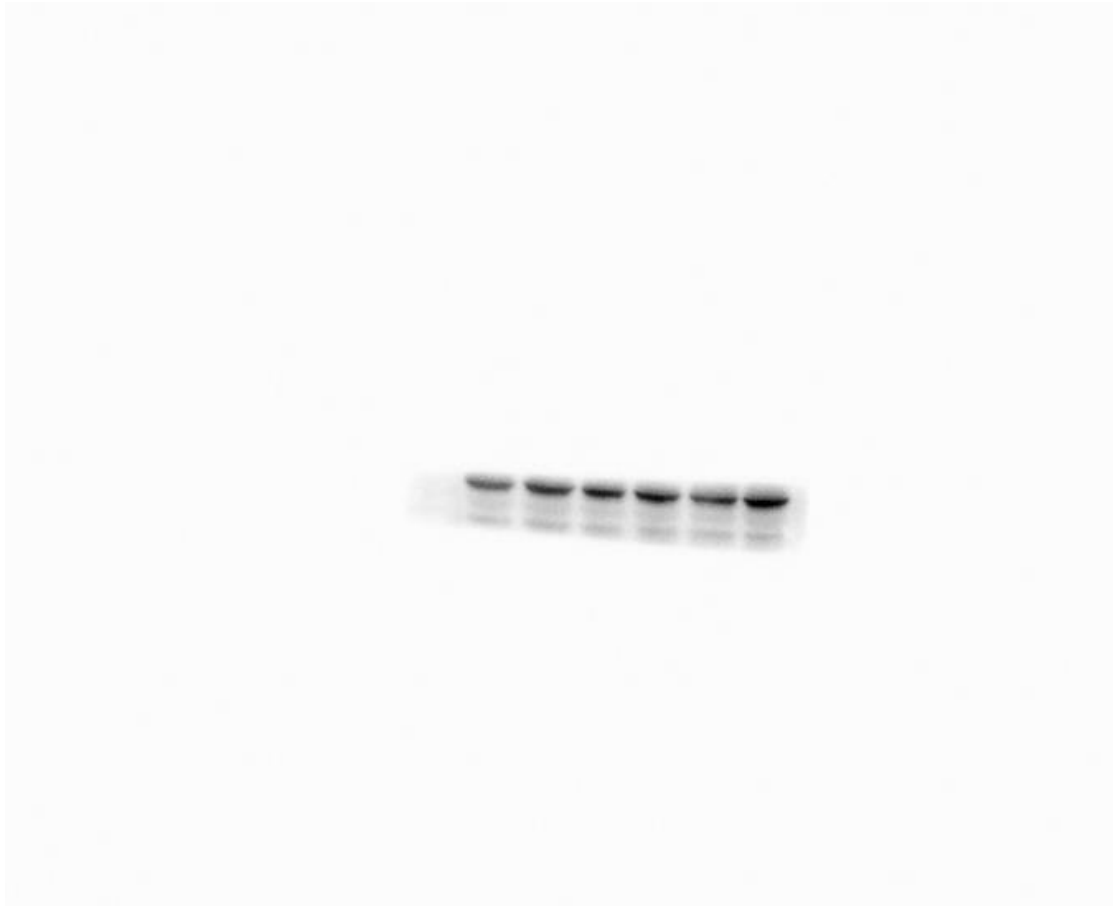

LPS-FPR3

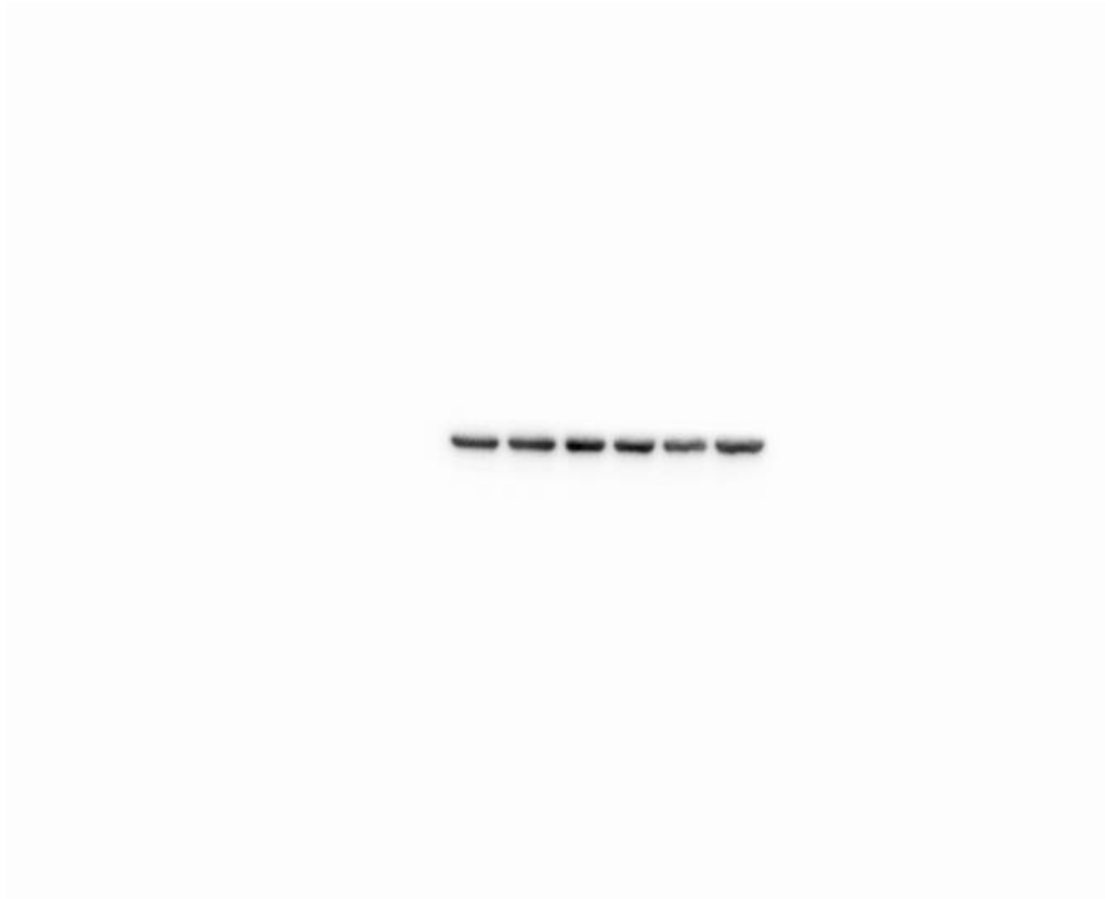

LPS-GAPDH

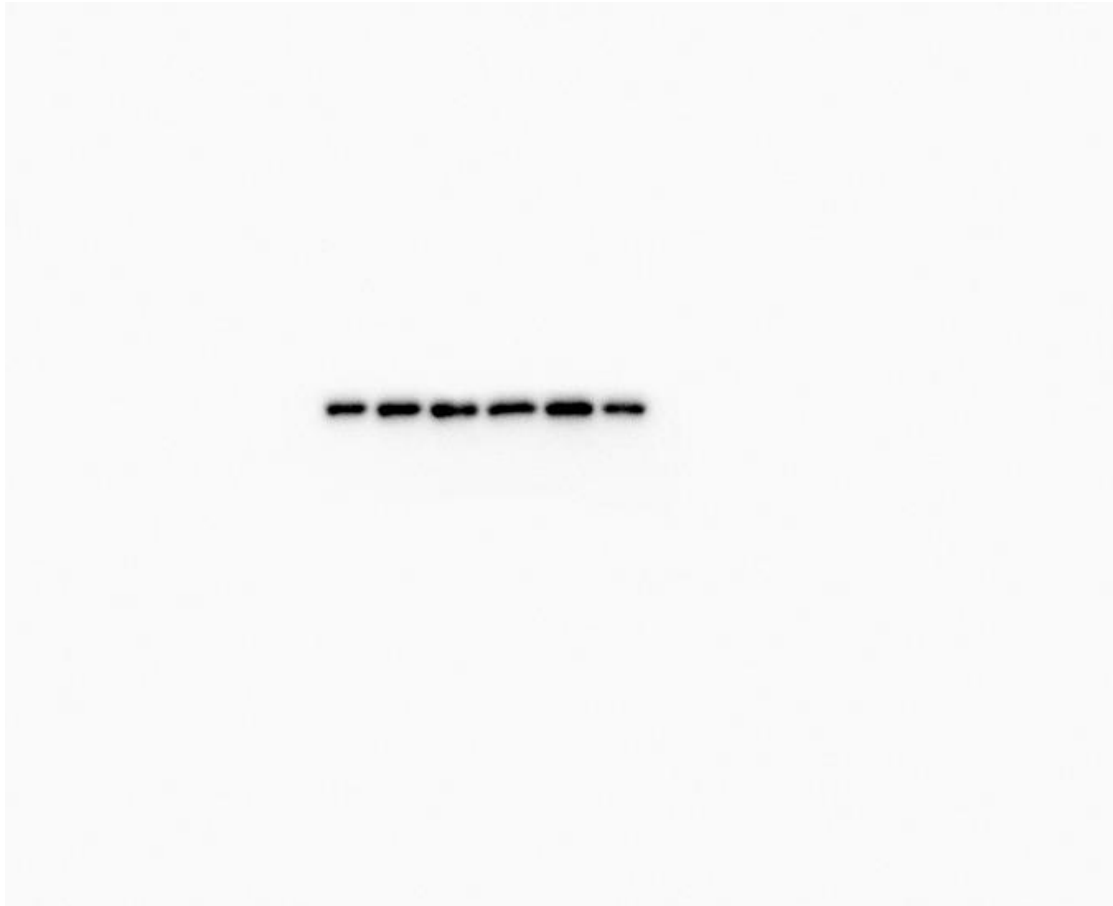

LPS-GAPDH2

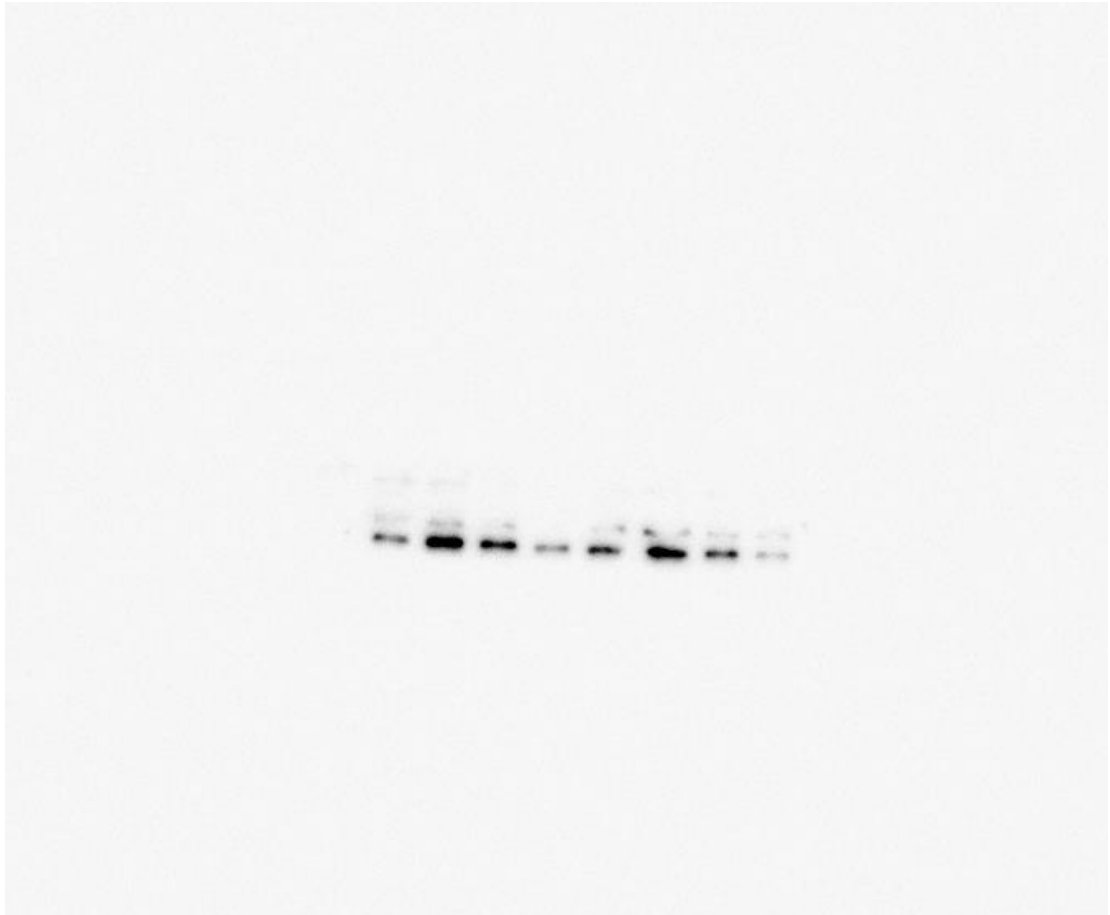

siRNA-FPR3—CCR2

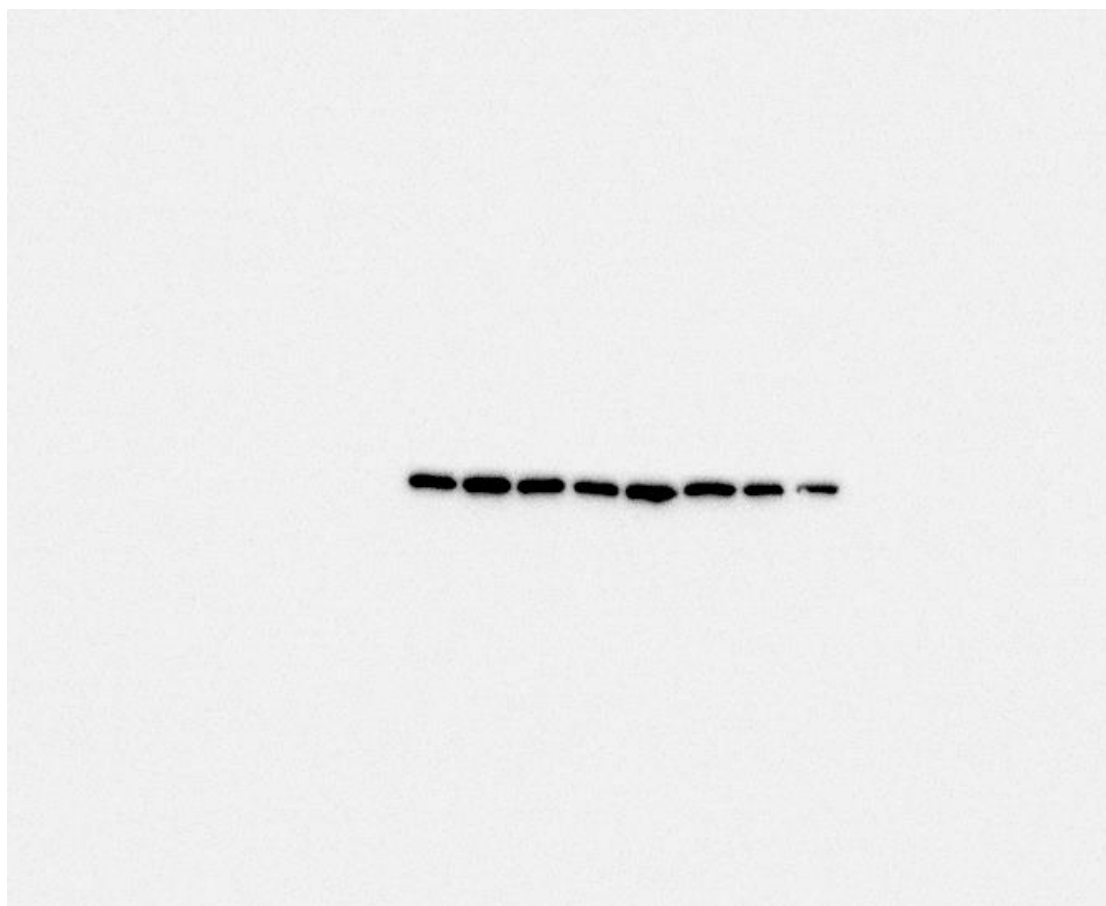

siRNA-FPR3—GAPDH
