# Supplementary material for: Identification and validation of candidate genes dysregulated in alveolar macrophages of acute respiratory distress syndrome
Source: PeerJ journal article supplement (doi:10.7717/peerj.12312), 2021-10-26
Supplement: FCM.pdf [file FCM.pdf]

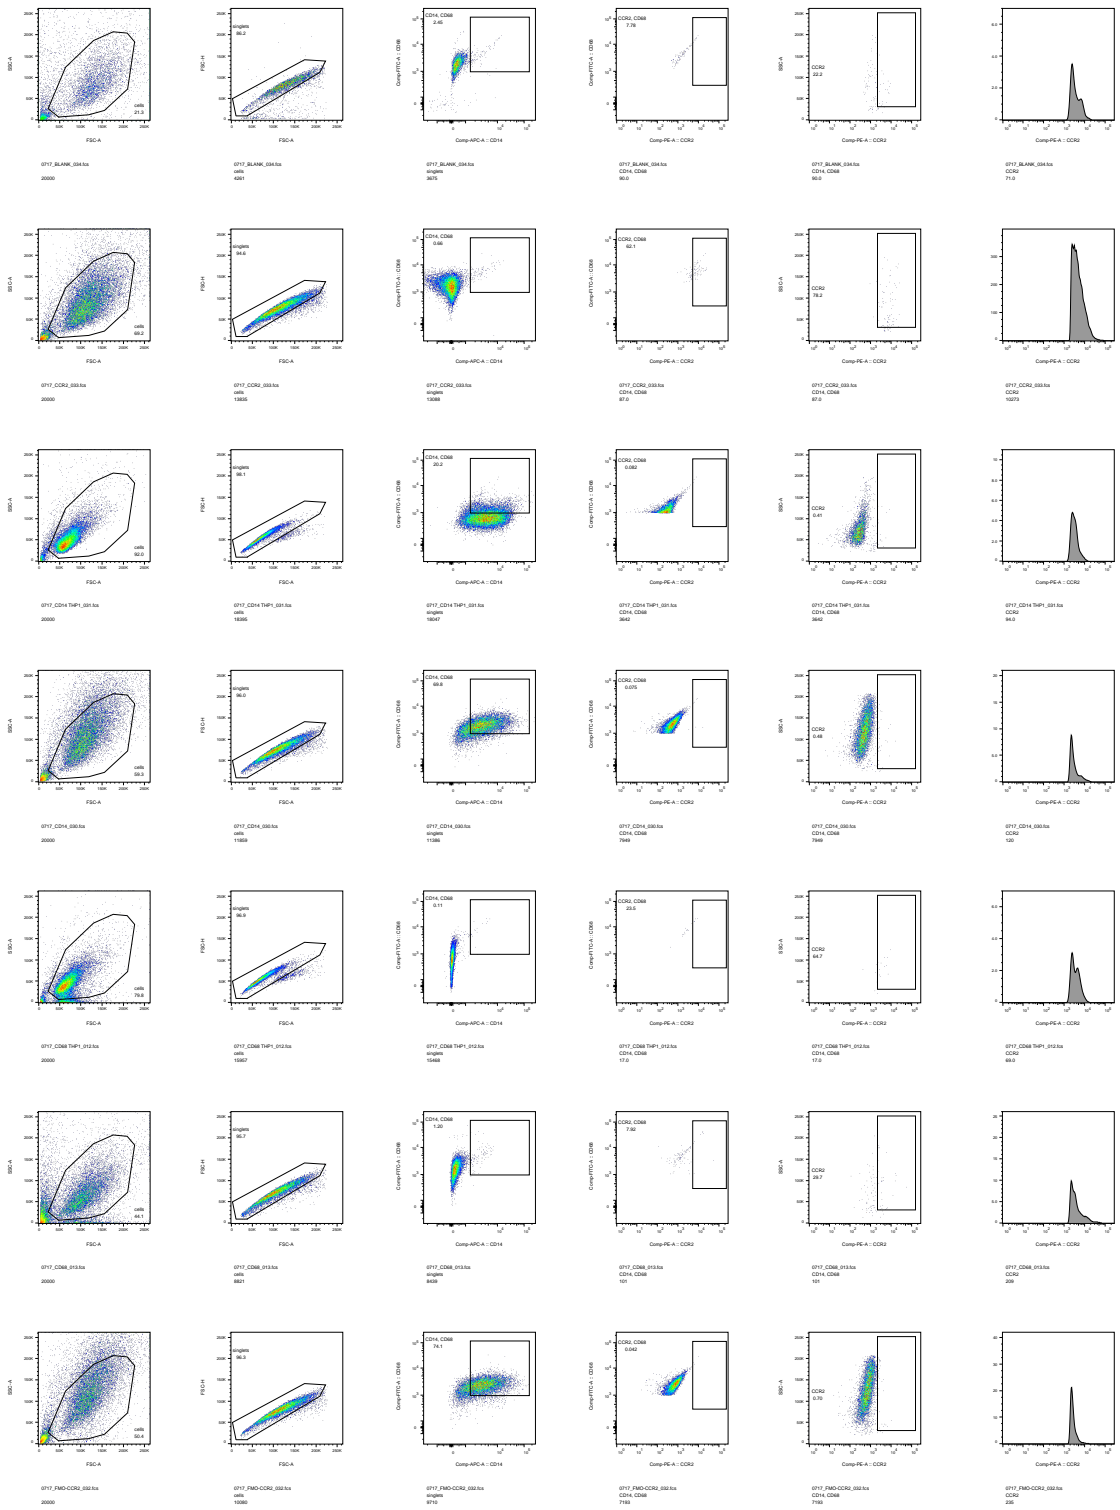



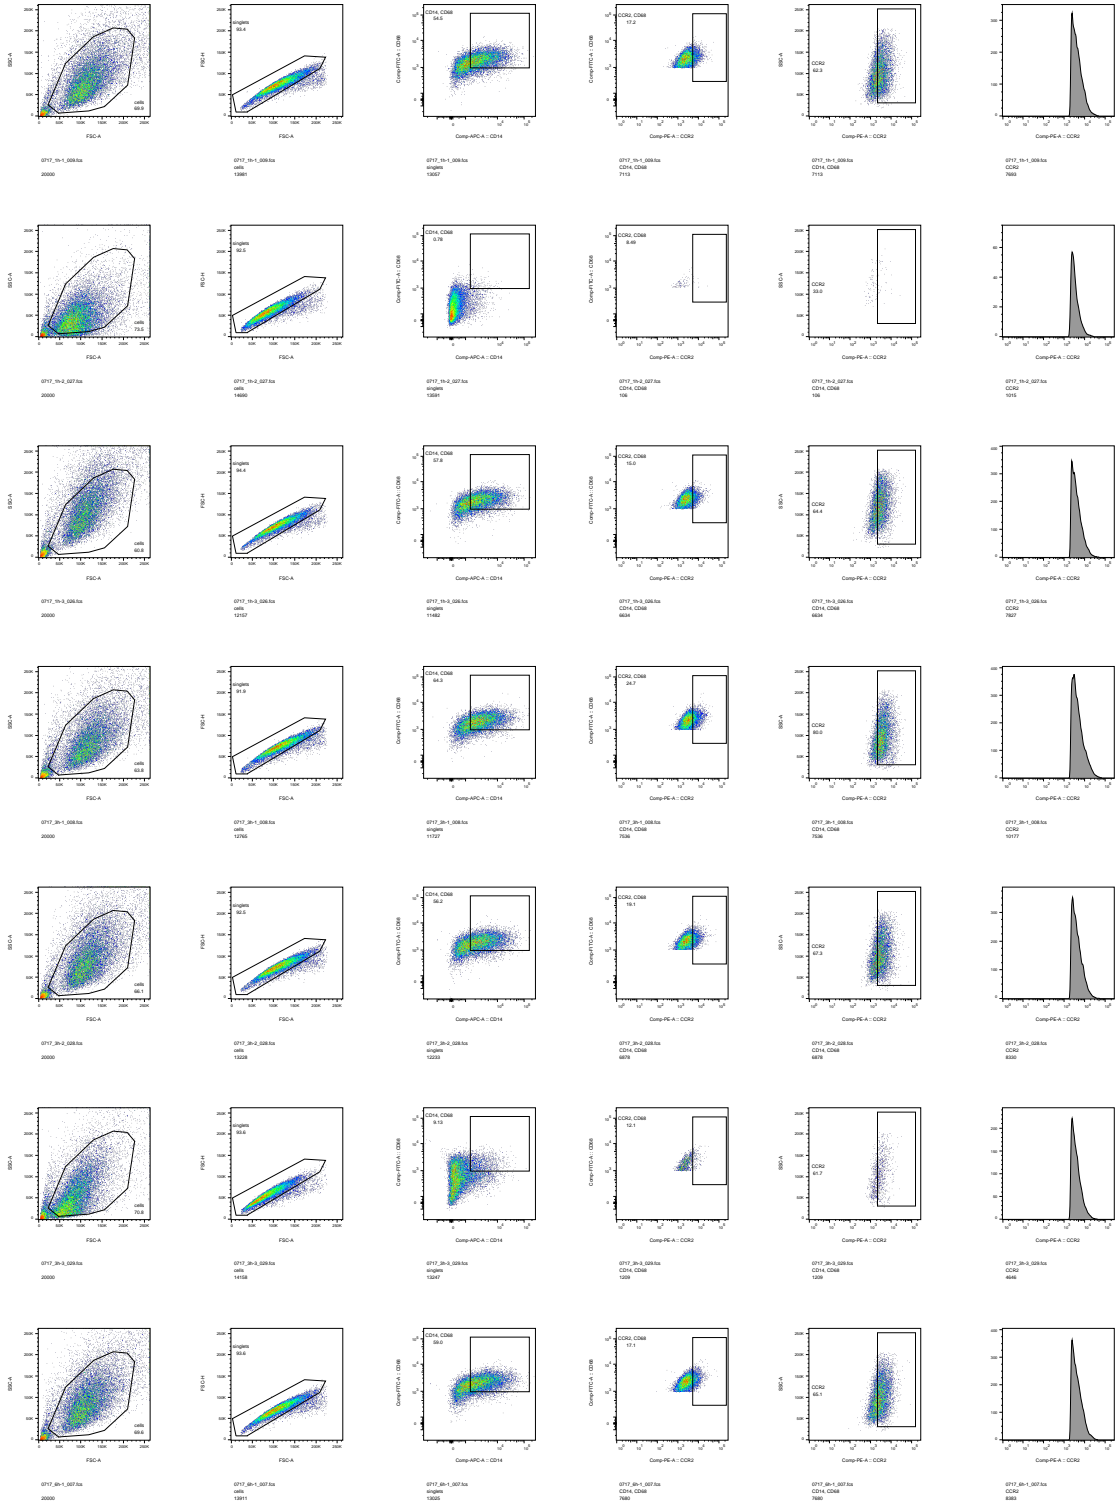

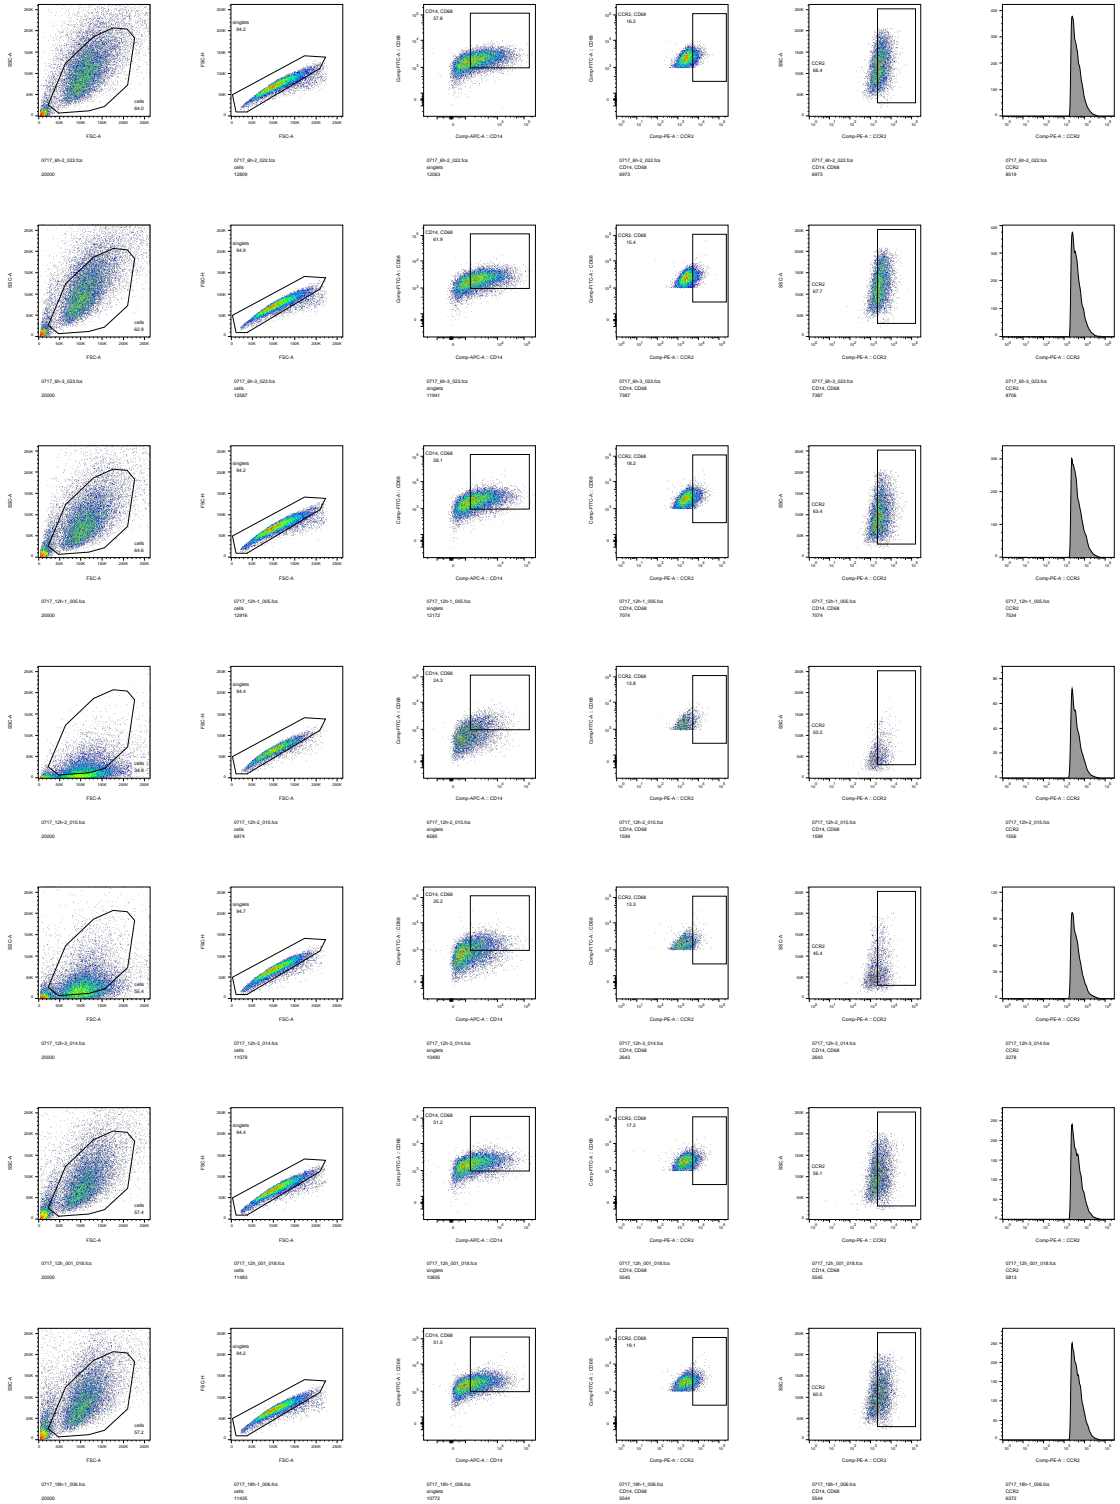

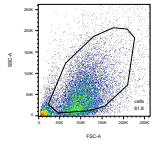

017\_18h-2\_016.tas  
2000

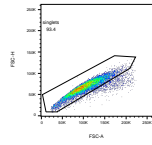

017\_18h-2\_016.tas  
all  
1282

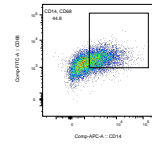

017\_18h-2\_016.tas  
all  
1282

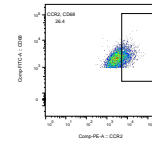

017\_18h-2\_016.tas  
CD14 : CD86  
all

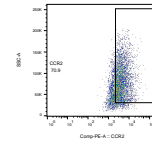

017\_18h-2\_016.tas  
CD14 : CD86  
all

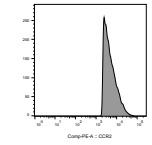

017\_18h-2\_016.tas  
CD86  
all

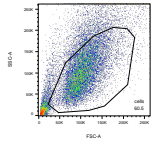

017\_18h-2\_017.tas  
2000

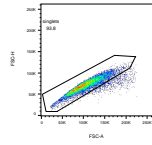

017\_18h-2\_017.tas  
all  
1288

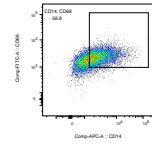

017\_18h-2\_017.tas  
all  
1288

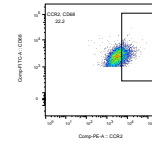

017\_18h-2\_017.tas  
CD14 : CD86  
all

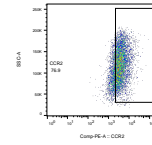

017\_18h-2\_017.tas  
CD14 : CD86  
all

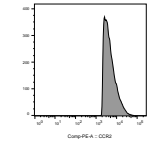

017\_18h-2\_017.tas  
CD86  
all
