# Supplementary material for: Identification and validation of candidate genes dysregulated in alveolar macrophages of acute respiratory distress syndrome
Source: PeerJ journal article supplement (doi:10.7717/peerj.12312), 2021-10-26

**Fig. 1**

**(A)**

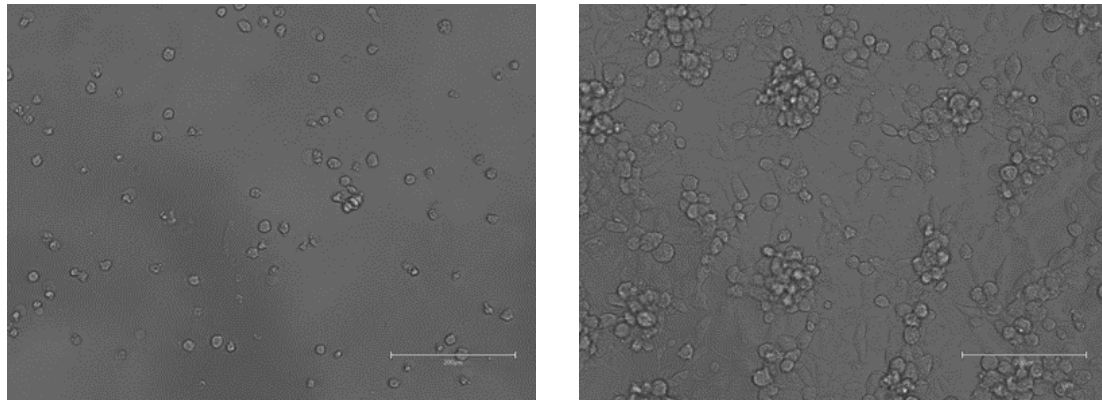

**THP-1 cells**

**PMA-differentiated macrophages**

**(B)**

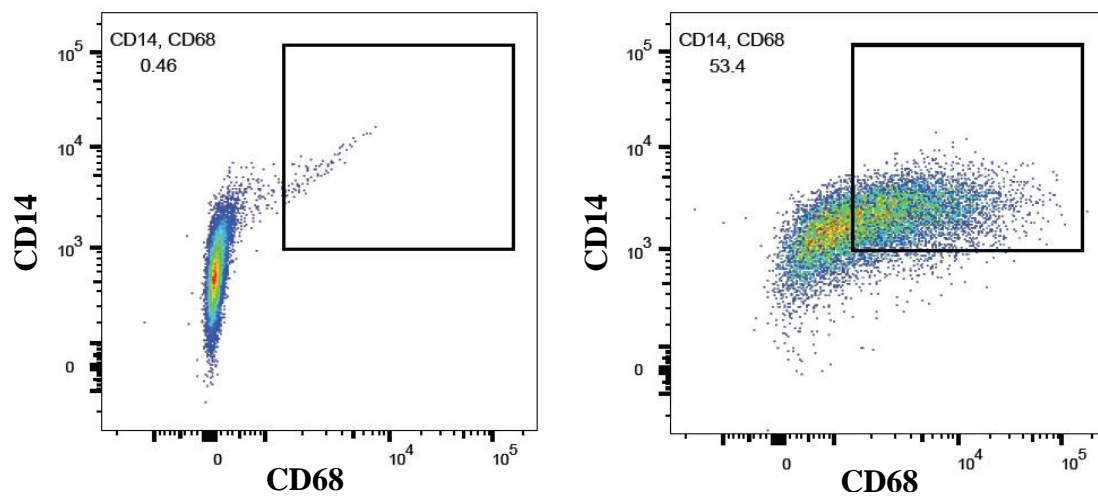

**THP-1 cells**

**PMA-differentiated macrophages**

**(C)**

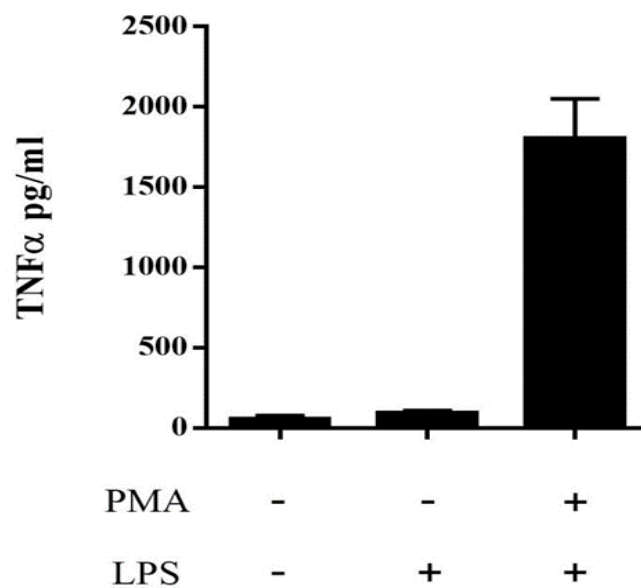

Supplement: Supplementary_Figure1.pdf [file Supplementary_Figure1.pdf]
