# Supplementary material for: Identification and validation of candidate genes dysregulated in alveolar macrophages of acute respiratory distress syndrome
Source: PeerJ journal article supplement (doi:10.7717/peerj.12312), 2021-10-26

**Fig. 2**

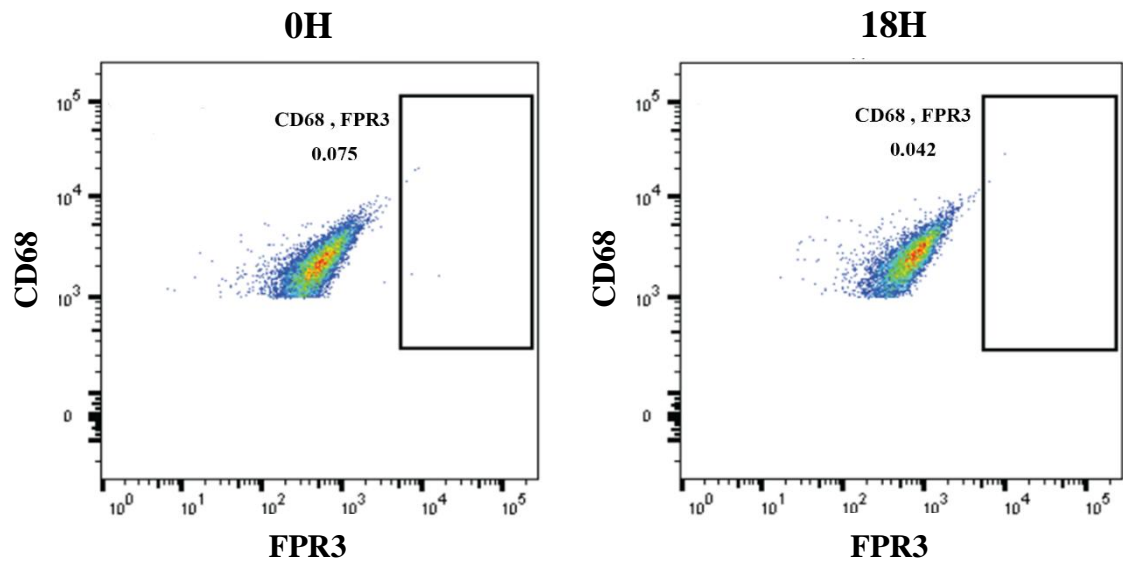

Supplement: Supplementary_Figure2.pdf [file Supplementary_Figure2.pdf]
