# Supplementary material for: Identification and validation of candidate genes dysregulated in alveolar macrophages of acute respiratory distress syndrome
Source: PeerJ journal article supplement (doi:10.7717/peerj.12312), 2021-10-26
Supplement: Supplementary_Table.pdf [file Supplementary_Table.pdf]

**Table1**

| <b>Primers</b>  | <b>Sequences</b>        |
|-----------------|-------------------------|
| <b>FPR3-F</b>   | GACTGATTCGCTCTTTGCCCAC  |
| <b>FPR3-R</b>   | TCTCCTCAGGAGGTGAAGCAGA  |
| <b>CXCL16-F</b> | CCTATGTGCTGTGCAAGAGGAG  |
| <b>CXCL16-R</b> | CTGGGCAACATAGAGTCCGTCT  |
| <b>CCL13-F</b>  | GATCTCCTTGCAGAGGCTGAAG  |
| <b>CCL13-R</b>  | TCTGGACCCACTTCTCCTTTGG  |
| <b>CX3CR1-F</b> | CACAAAGGAGCAGGCATGGAAG  |
| <b>CX3CR1-R</b> | CAGGTTCTCTGTAGACACAAGGC |
| <b>PLAU-F</b>   | GGCTTAACTCCAACACGCAAGG  |
| <b>PLAU-R</b>   | CCTCCTTGGAACGGATCTTCAG  |
| <b>CCR2-F</b>   | TACGGTGCTCCCTGTCATAAA   |
| <b>CCR2-R</b>   | TAAGATGAGGACGACCAGCAT   |
